# Supplementary material for: Single-Cell Chemical Proteomics (SCCP) Interrogates the Timing and Heterogeneity of Cancer Cell Commitment to Death
Source: PubMed Central journal article supplement (PMC9260713; doi:10.1021/acs.analchem.2c00413), 2022-06-22

## Supporting Information

### Single Cell Chemical Proteomics (SCCP) Interrogates the Timing and Heterogeneity of Cancer Cell Commitment to Death

Ákos Végvári\*, Jimmy E Rodriguez, Roman A Zubarev\*

Division of Chemistry I, Department of Medical Biochemistry & Biophysics, Karolinska Institutet, Biomedicum A9, Solnavägen 9, SE-171 77 Stockholm, Sweden

\*Corresponding authors: Ákos Végvári ([akos.vegvári@ki.se](mailto:akos.vegvári@ki.se)) and Roman A Zubarev ([roman.zubarev@ki.se](mailto:roman.zubarev@ki.se))

#### Table of contents:

|                              |     |
|------------------------------|-----|
| <i>Supplementary figures</i> | S2  |
| Figure S1.                   | S2  |
| Figure S2.                   | S4  |
| Figure S3.                   | S5  |
| Figure S4.                   | S5  |
| Figure S5.                   | S8  |
| Figure S6.                   | S10 |
| Figure S7.                   | S11 |
| Figure S8.                   | S14 |
| Figure S9.                   | S17 |
| Figure S10.                  | S23 |
| Figure S11.                  | S24 |

## Supplementary figures

**Figure S1.** A) Summary table with the number of peptides and proteins identified in the raw data before filtering and after applying the data analysis workflow. B) Schematic representation of the bioinformatic workflow applied to the data acquired with single cells. C) As an example, PCA of eight TMT-sets are depicted before and after the batch correction.

**A**

|         | Before filtering |         | After filtering |         |
|---------|------------------|---------|-----------------|---------|
|         | Peptide          | Protein | Peptide         | Protein |
| MTX_3h  | 17757            | 2325    | 12910           | 1931    |
| MTX_6h  | 13731            | 1988    | 9767            | 1625    |
| MTX_12h | 20415            | 2481    | 19405           | 1585    |
| MTX_24h | 17874            | 2240    | 17074           | 1627    |
| MTX_48h | 19664            | 2397    | 11692           | 1738    |
| CPT_12h | 18055            | 2188    | 9945            | 1487    |
| CPT_24h | 16099            | 1958    | 10802           | 1570    |
| CPT_48h | 17710            | 2244    | 10940           | 1662    |
| TDX_12h | 17744            | 2169    | 12808           | 1786    |
| TDX_24h | 15790            | 2037    | 15212           | 1746    |
| TDX_48h | 16464            | 2132    | 12076           | 1833    |

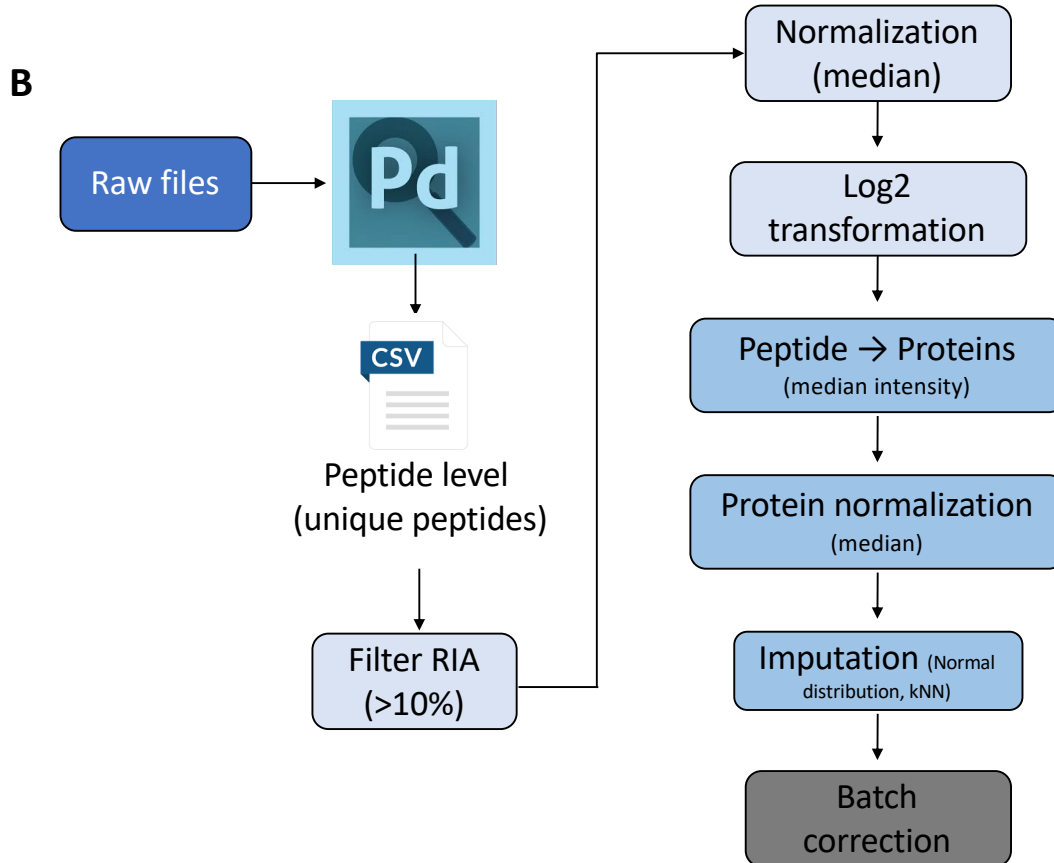

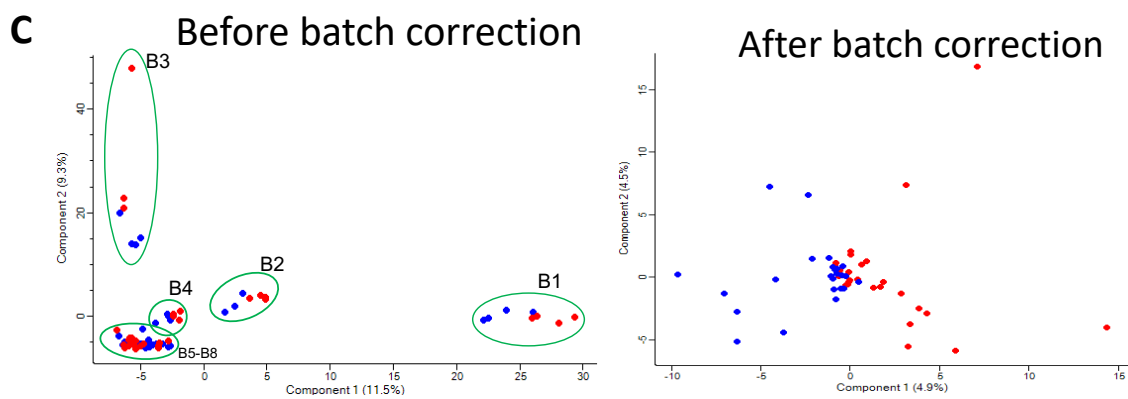

**Figure S2.** Cell viability diagrams for three drugs (methotrexate, MTX; camptothecin, CPT; tomudex, TDX) used with A549 cells.

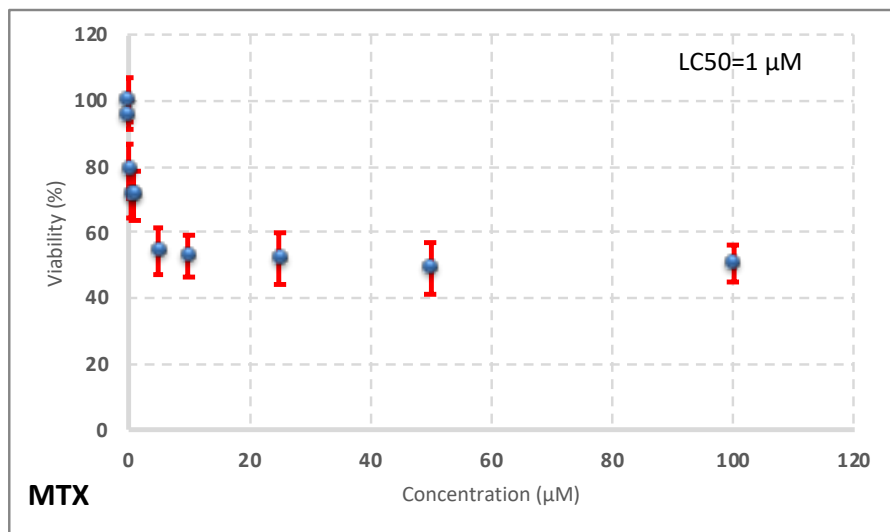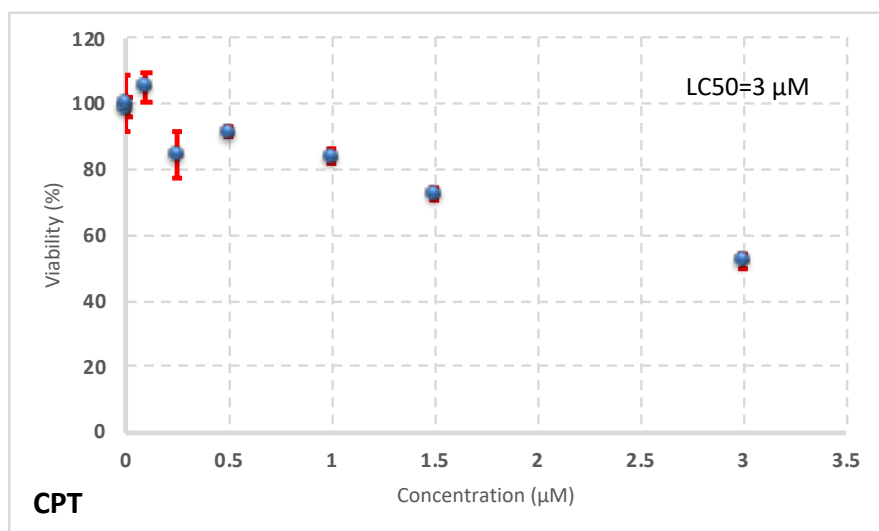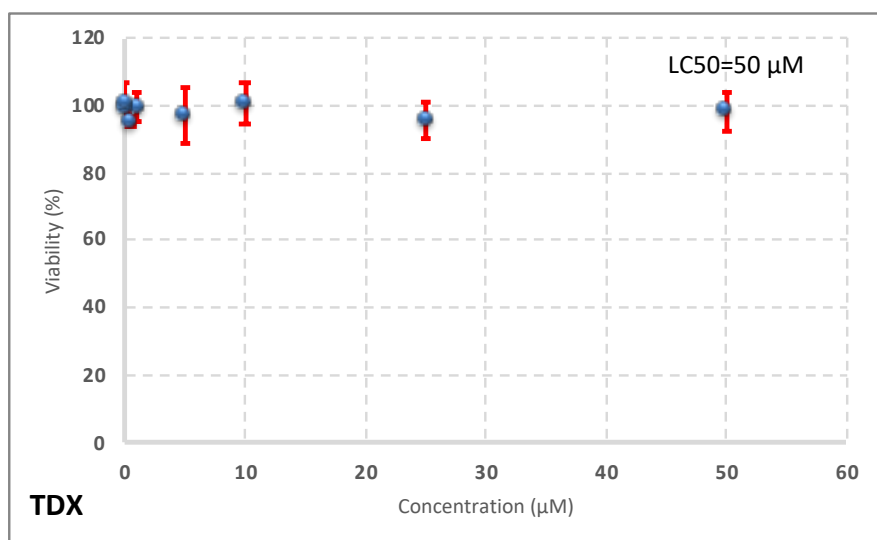

**Figure S3.** FACS diagrams with gating conditions for isolating individual DMSO-treated (A) and MTX-treated (B) A549 cells after 48 h.

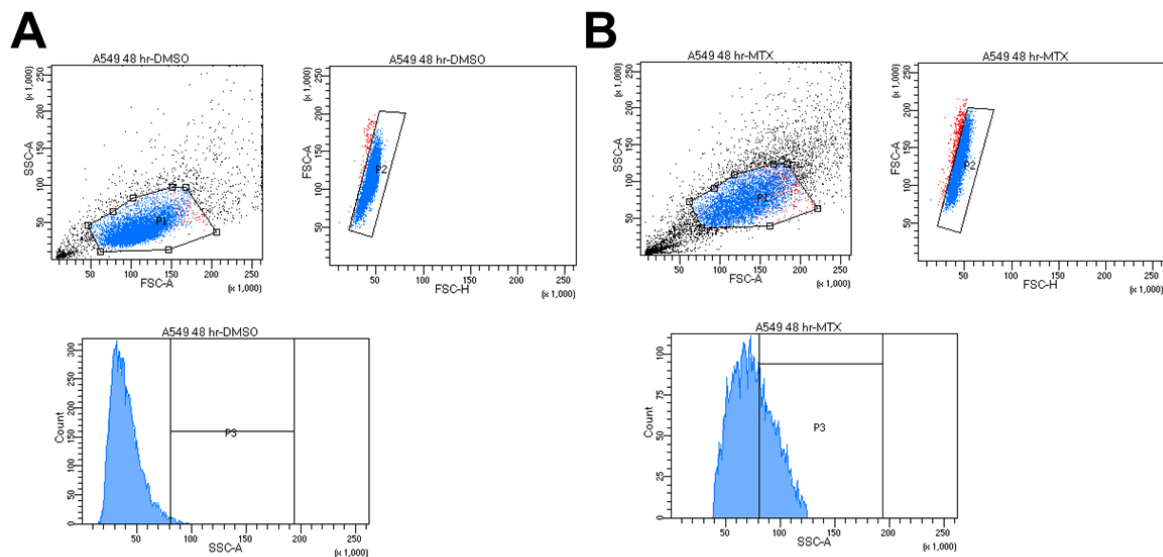

**Figure S4.** PCA plots of the proteomics results on MTX treated single cell presented in *Figure 2*, coloring the cells after the batches.

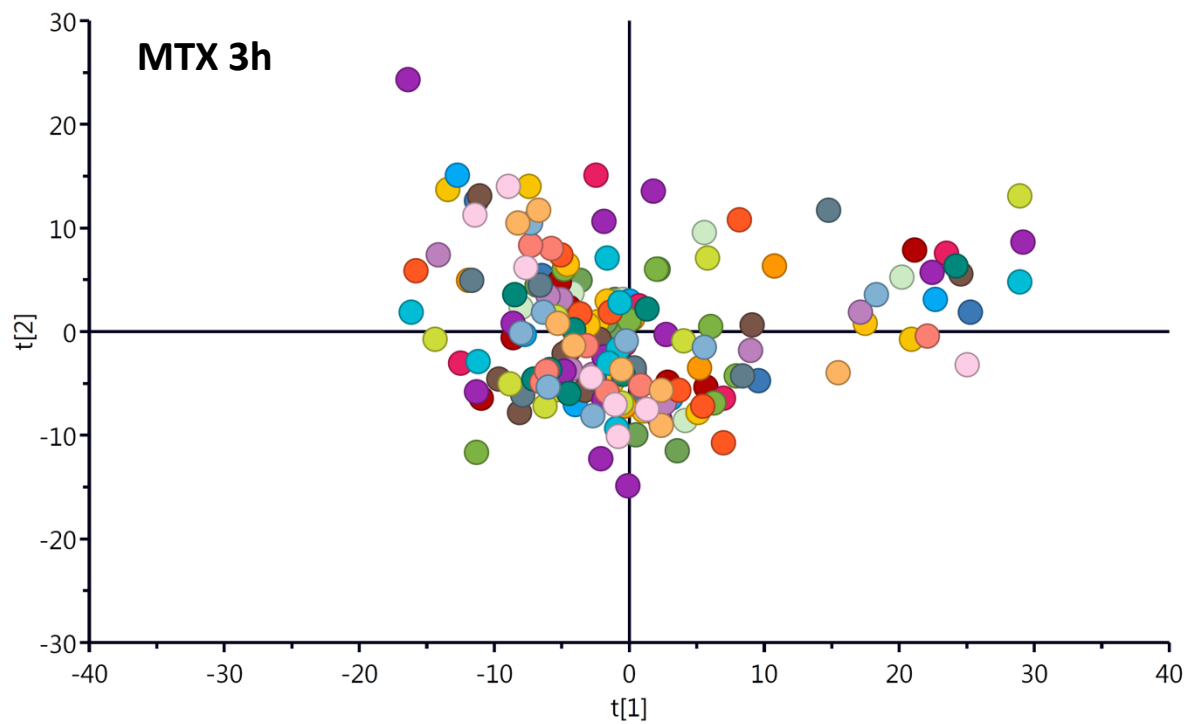

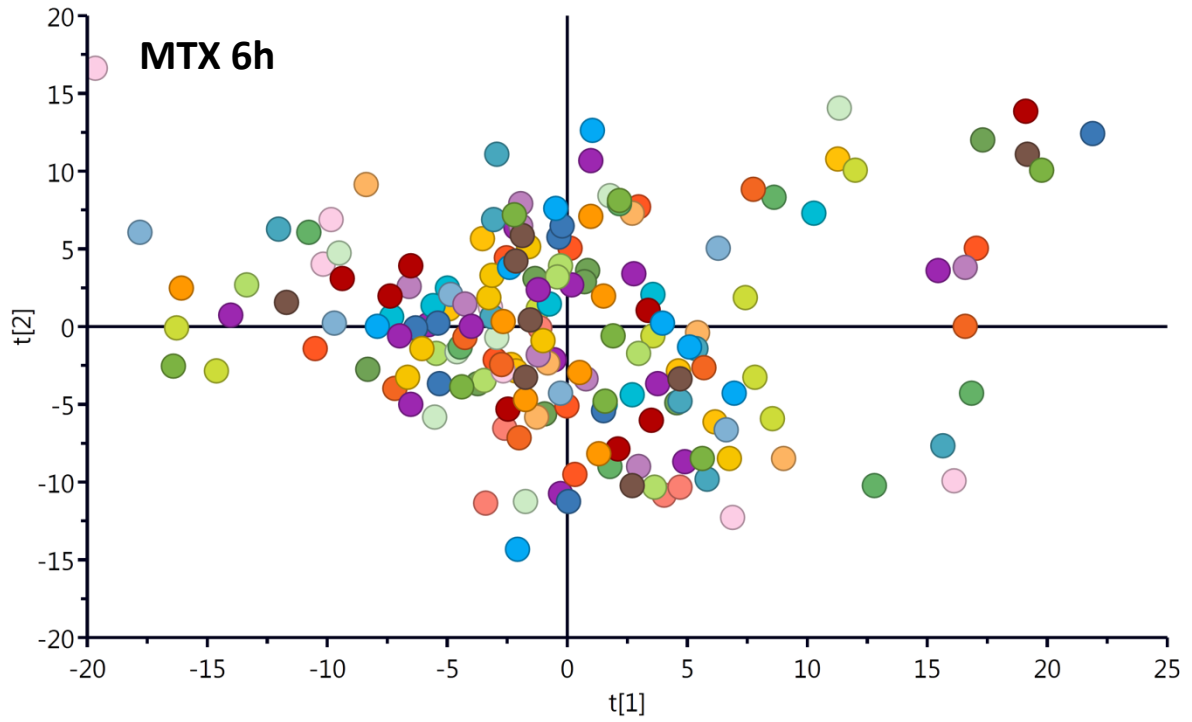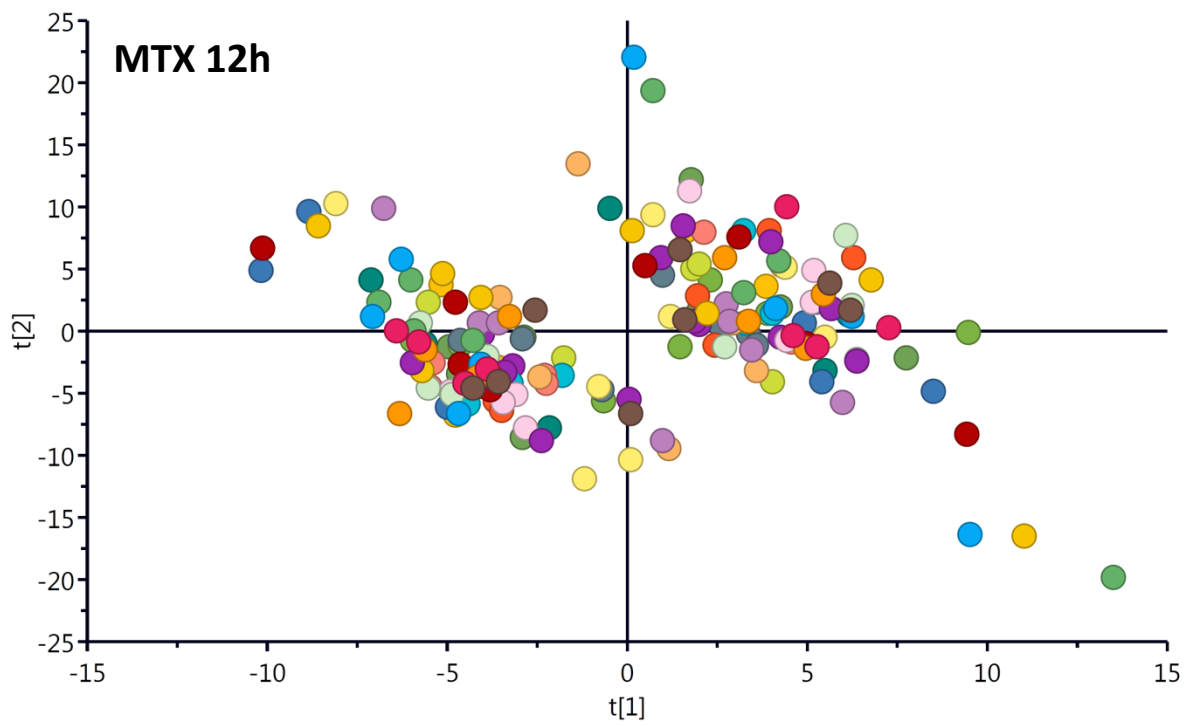

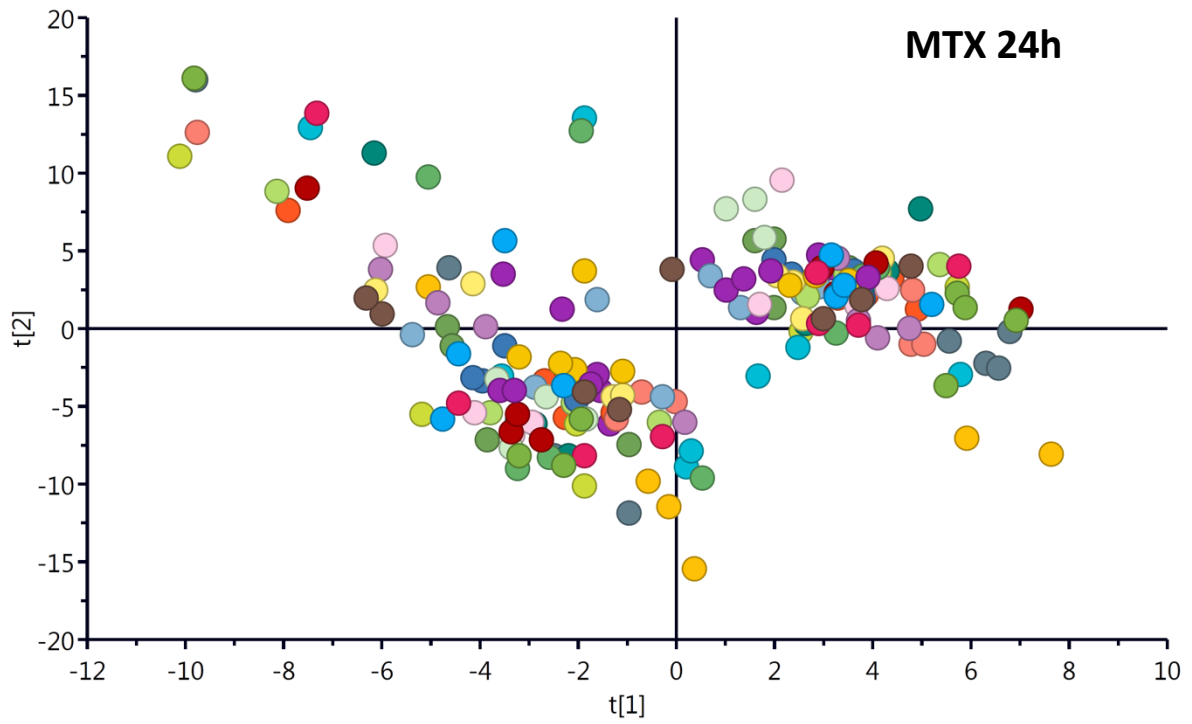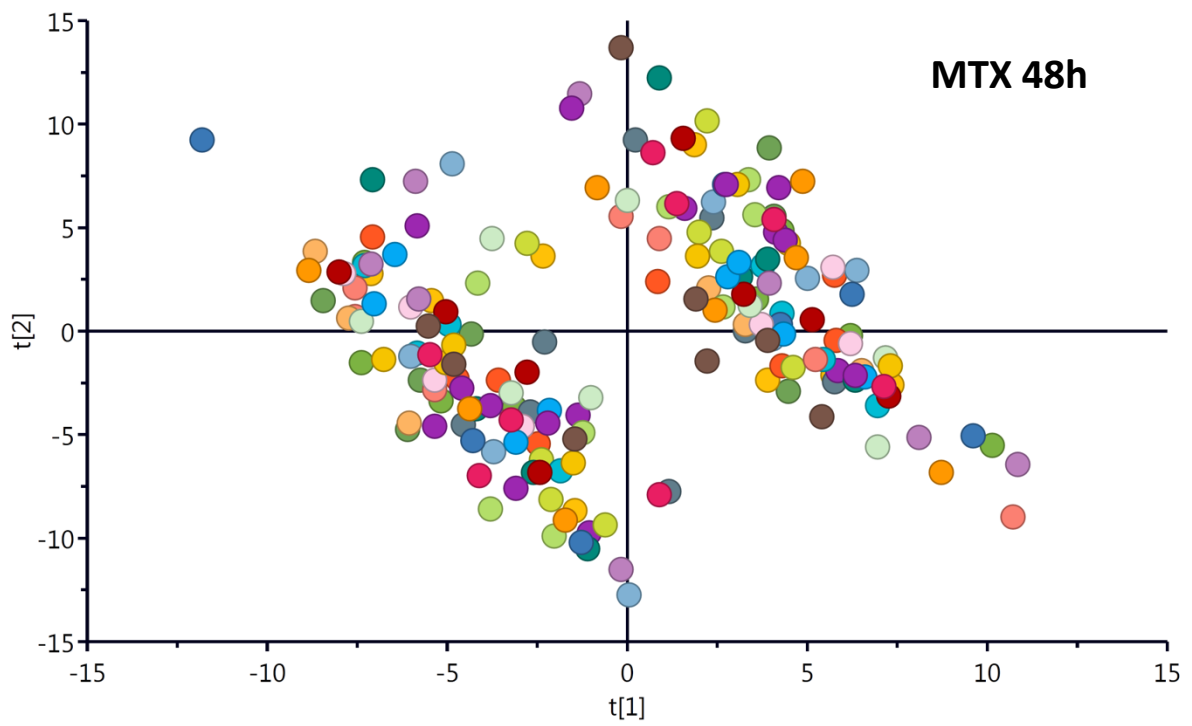

Figure S5. Same as in Figure S4, coloring the cells after the TMT channels.

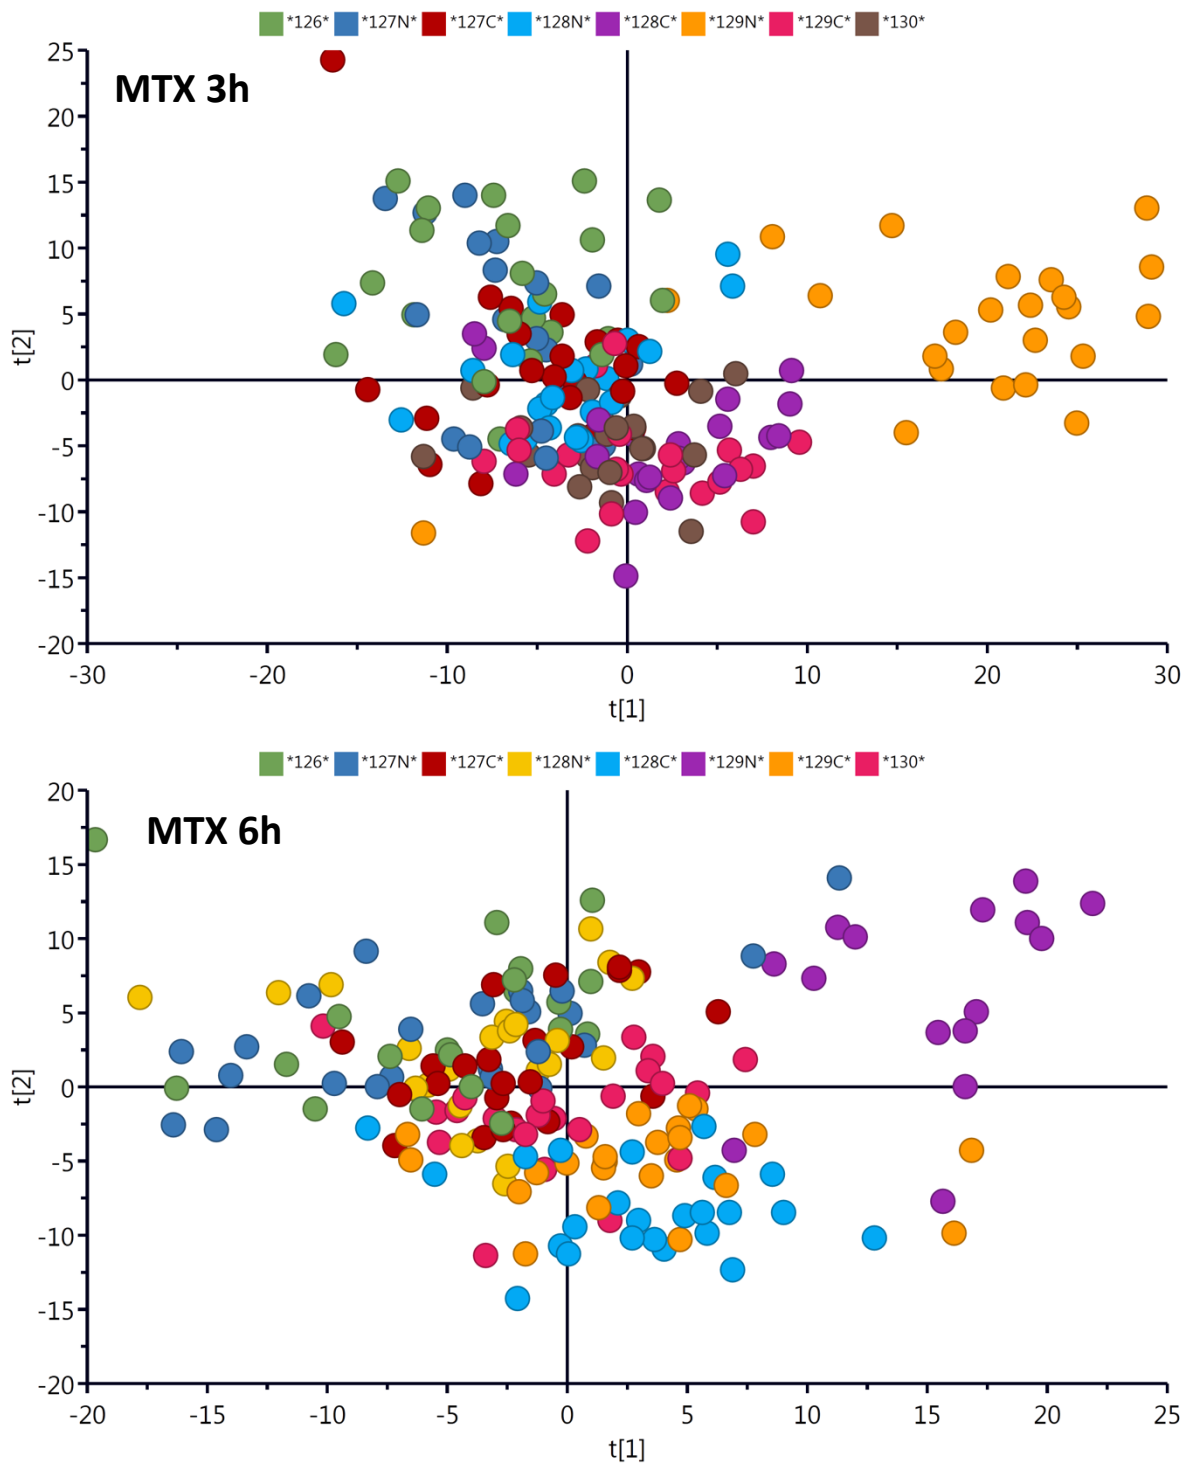



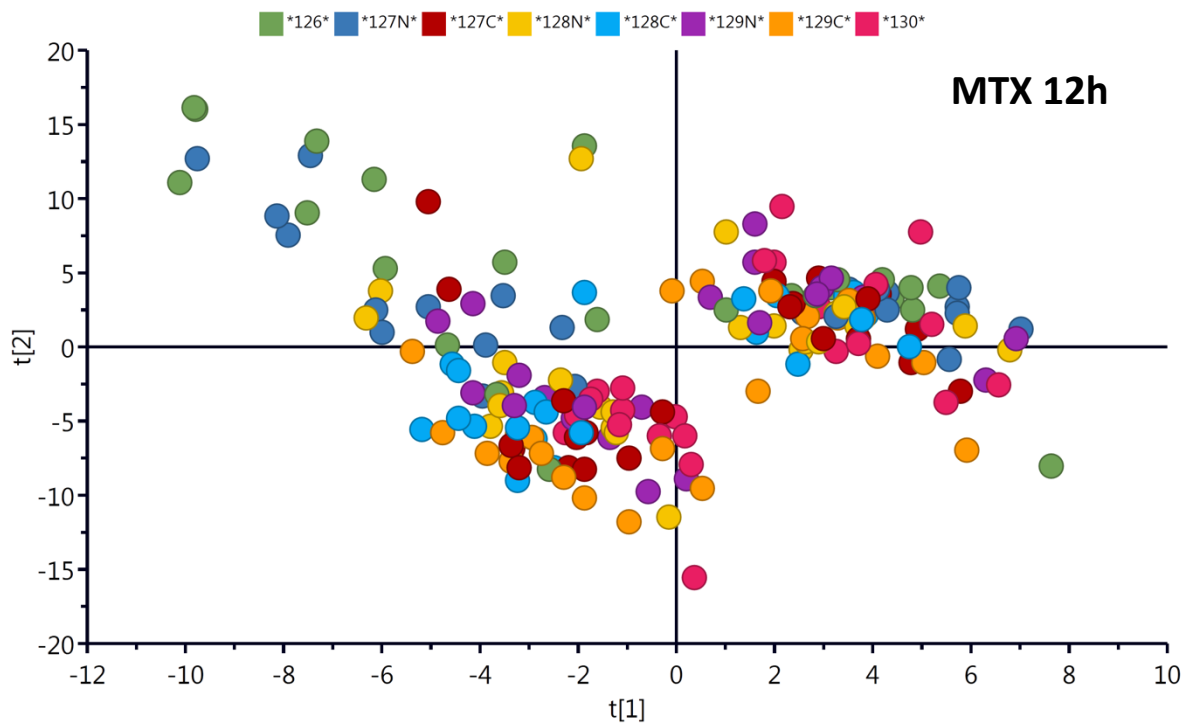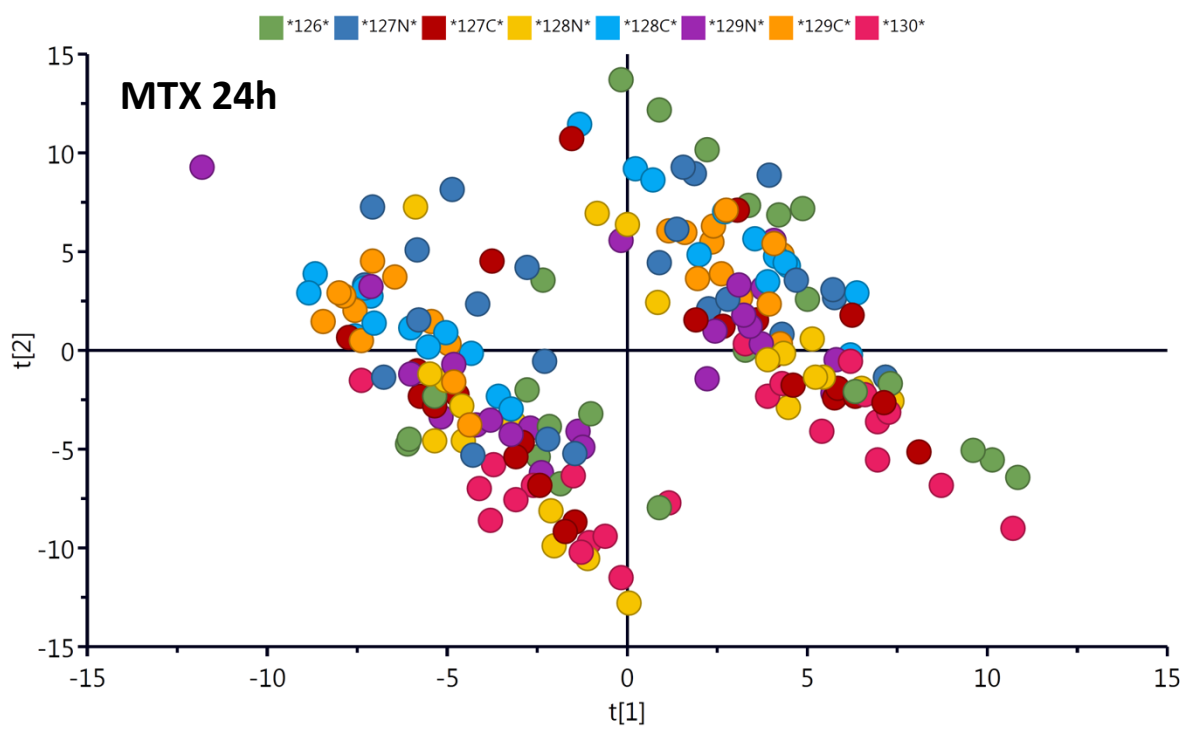

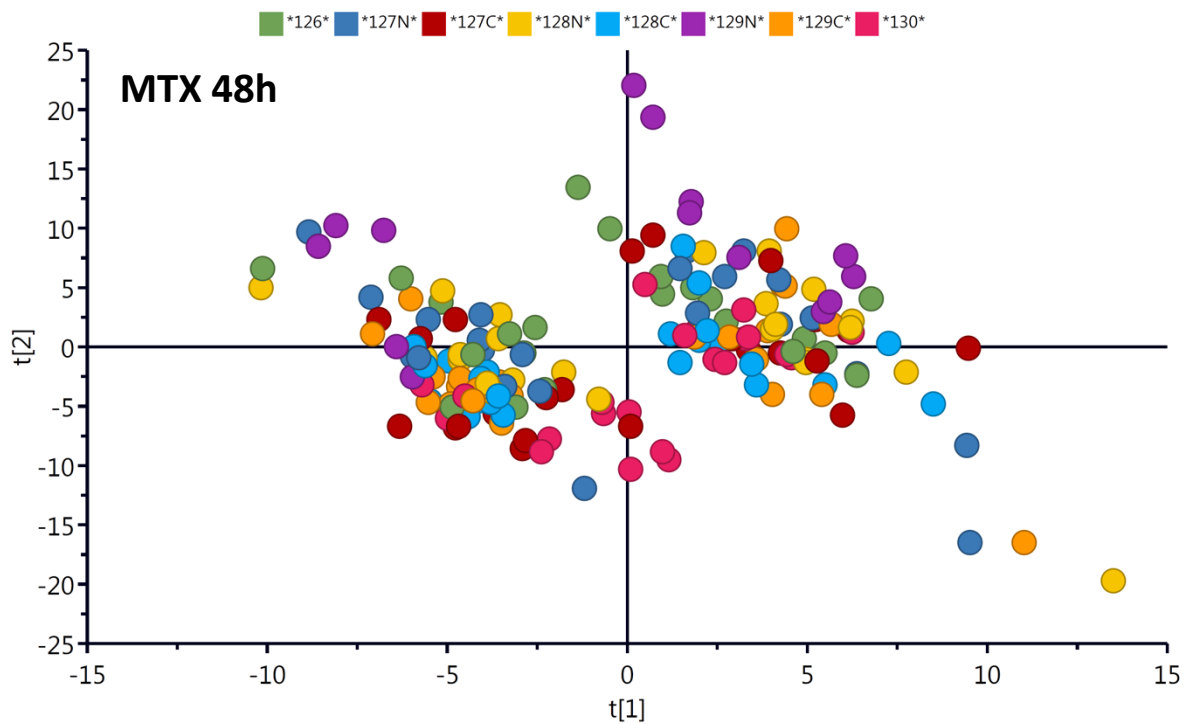

**Figure S6.** Clustering of the proteomes of attached treated single cells provides two groups of cells, G1 and G2.

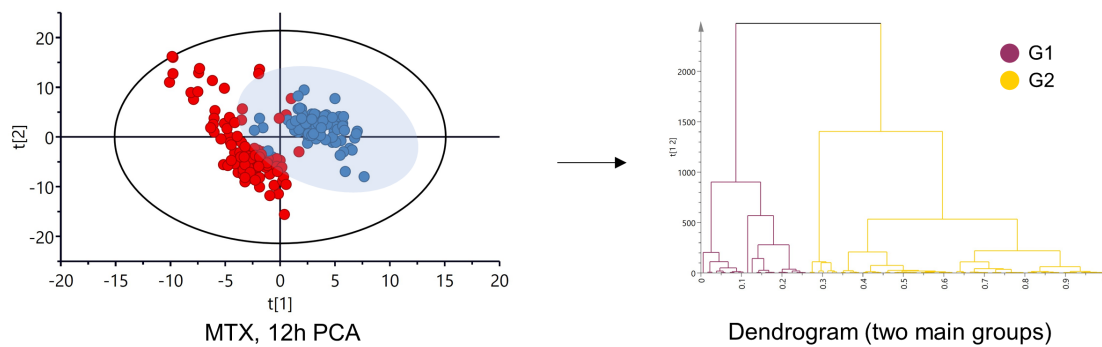

**Figure S7.** Same as in Figure S4, coloring the treated cells after the G1 and G2 subpopulations (depicted in red and blue colors, respectively; while untreated cells are shown as empty circles).

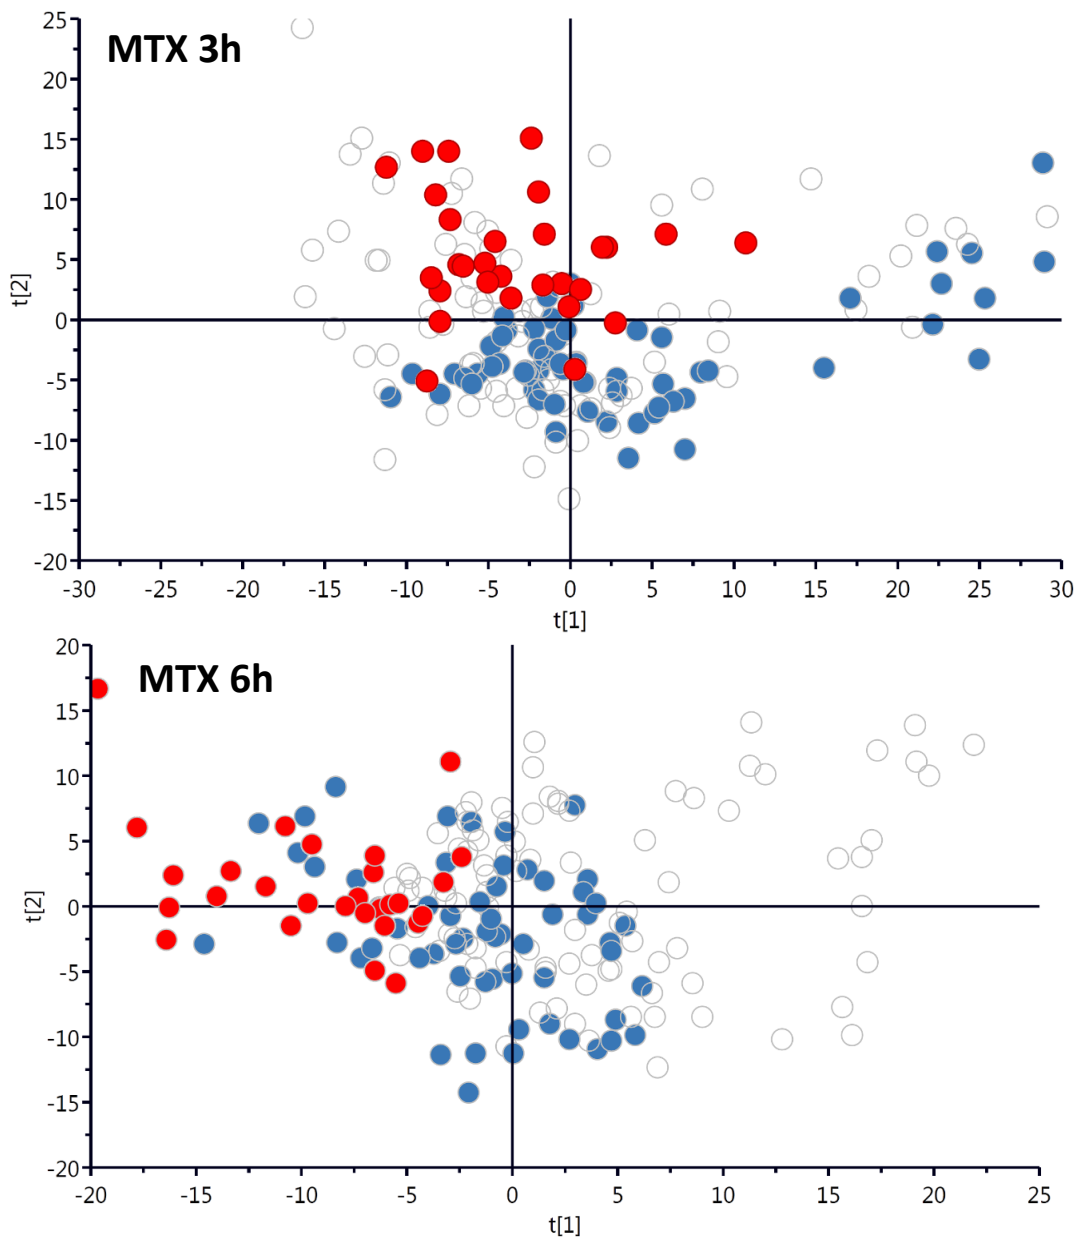

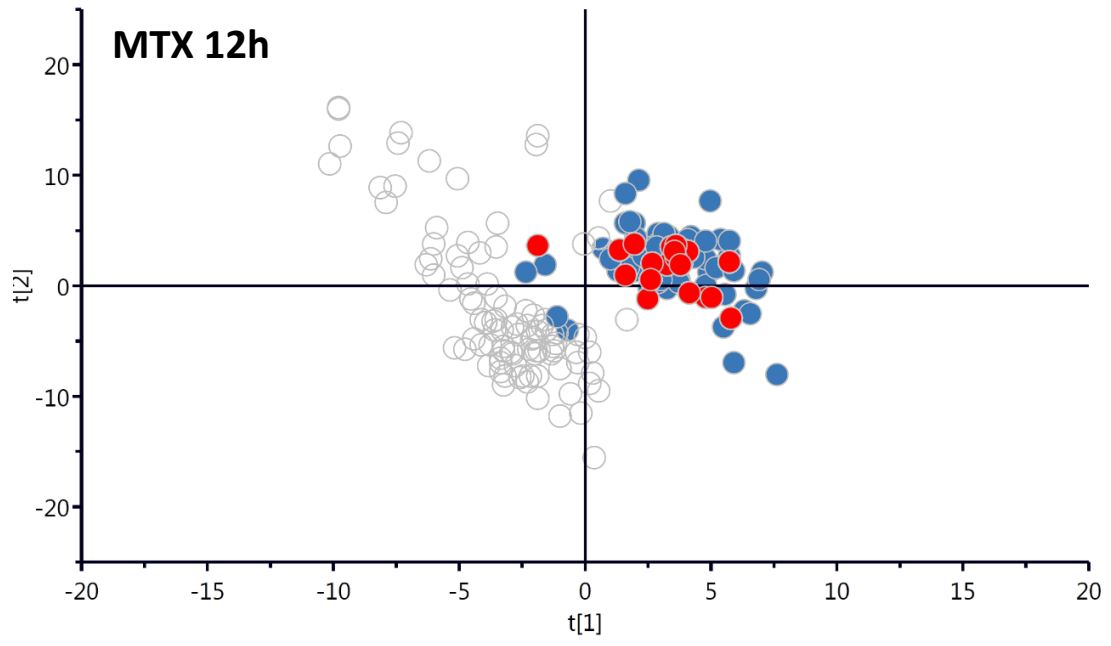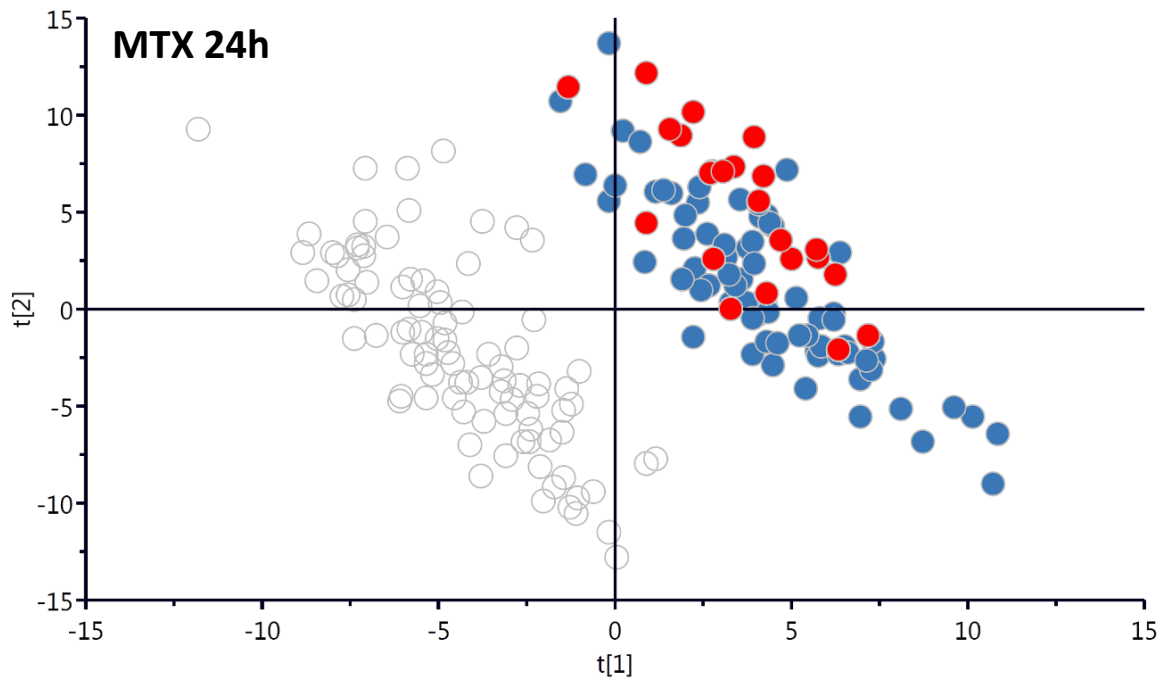

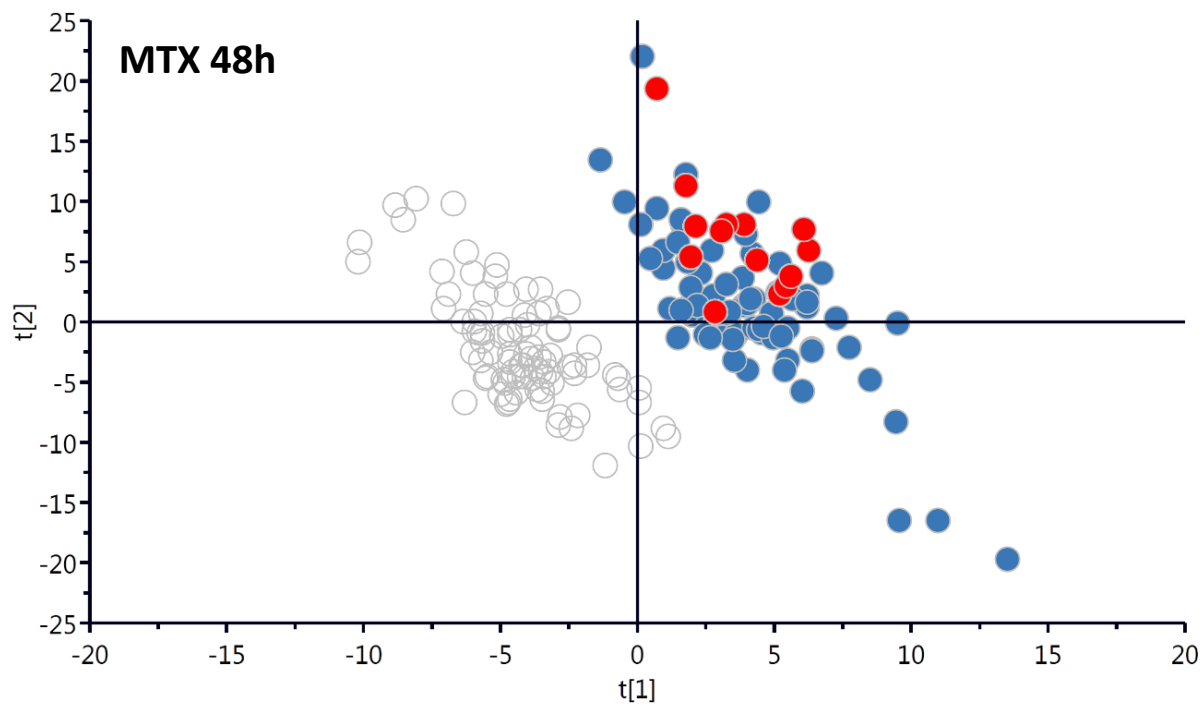

**Figure S8.** Volcano plots of data presented in *Figures 2 and 4*, with proteins re-colored according to their relative abundance in the sample (low to high proteins abundance = red-yellow-blue).

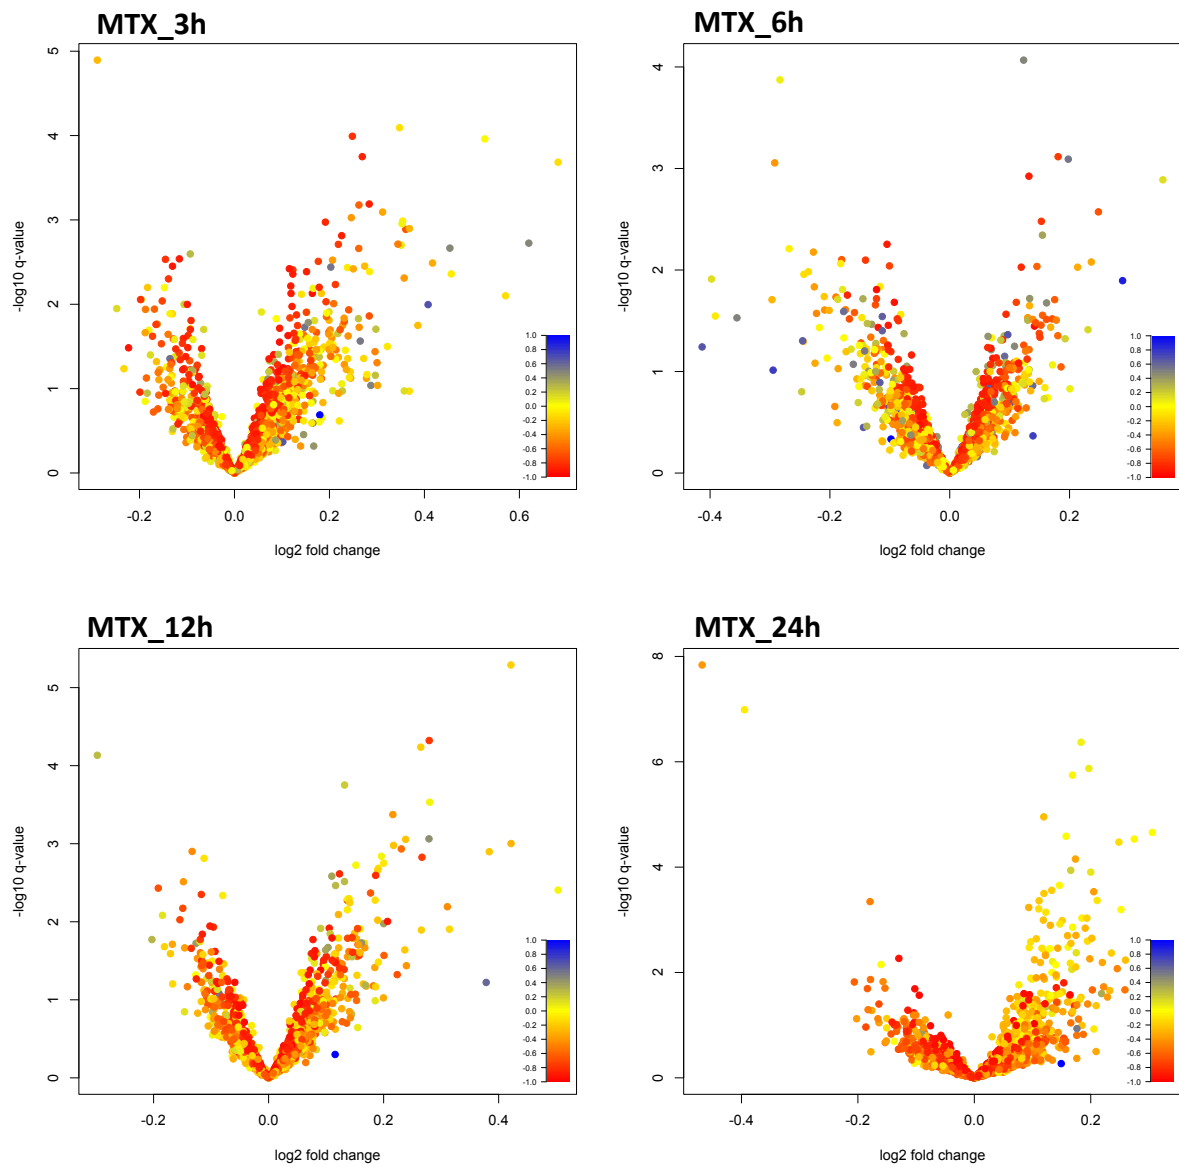

**MTX\_48h**

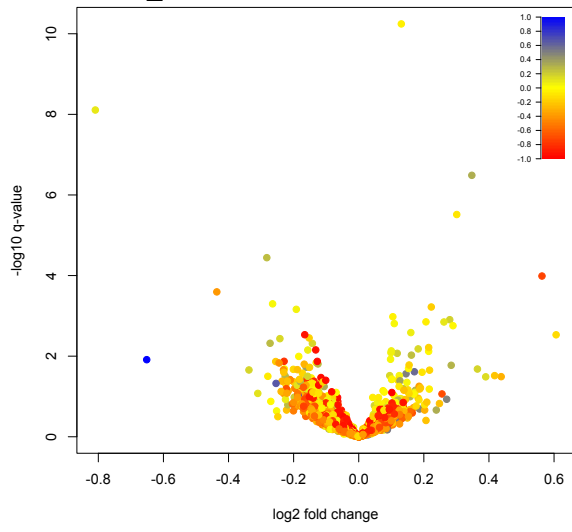

**CPT\_12h**

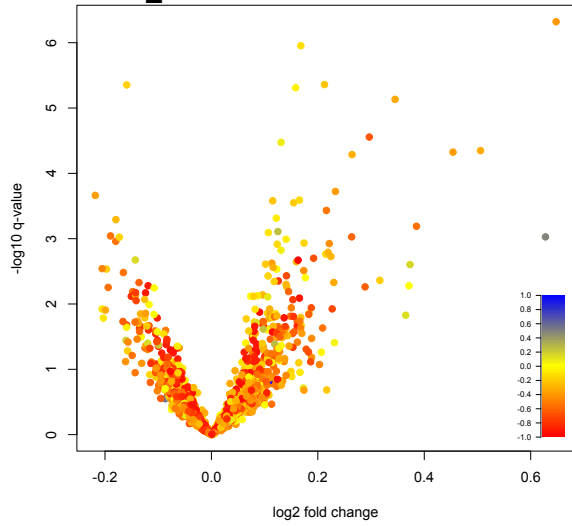

**CPT\_24h**

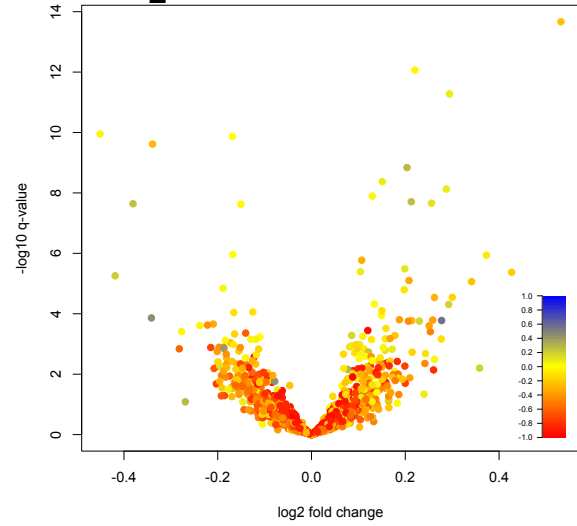

**CPT\_48h**

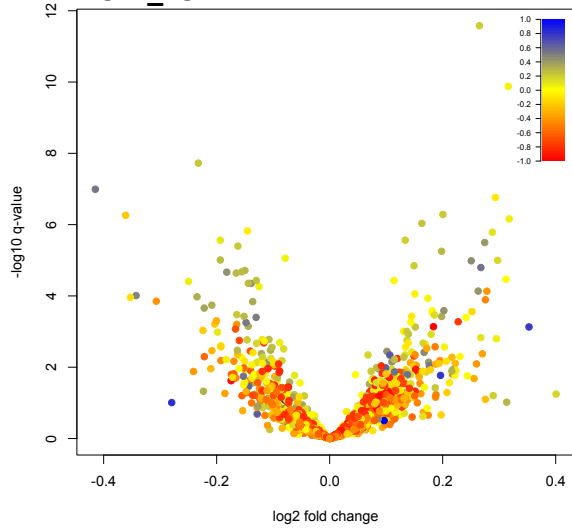

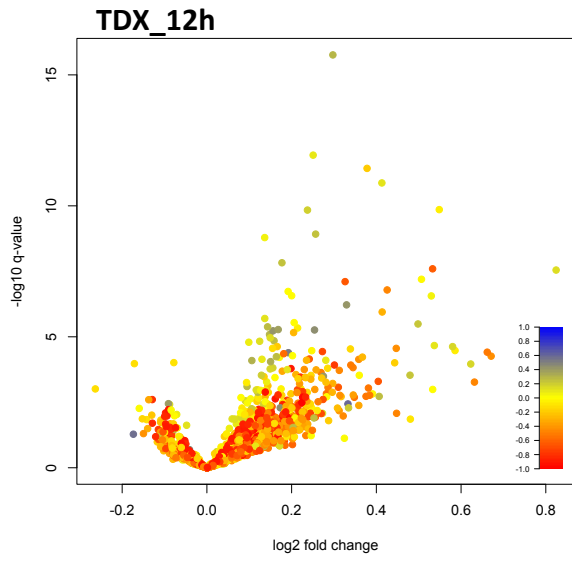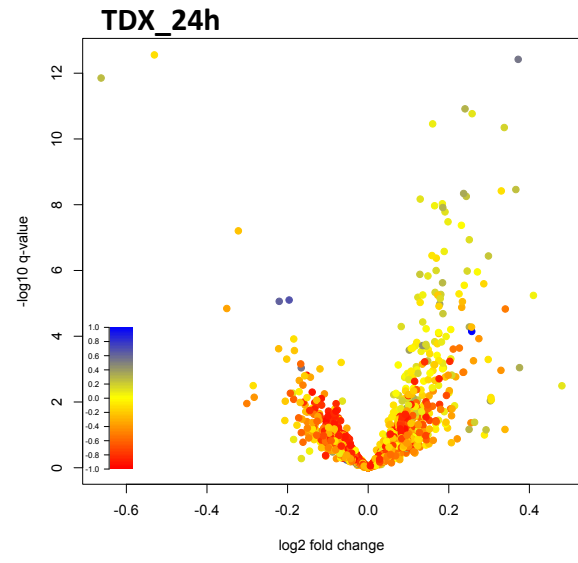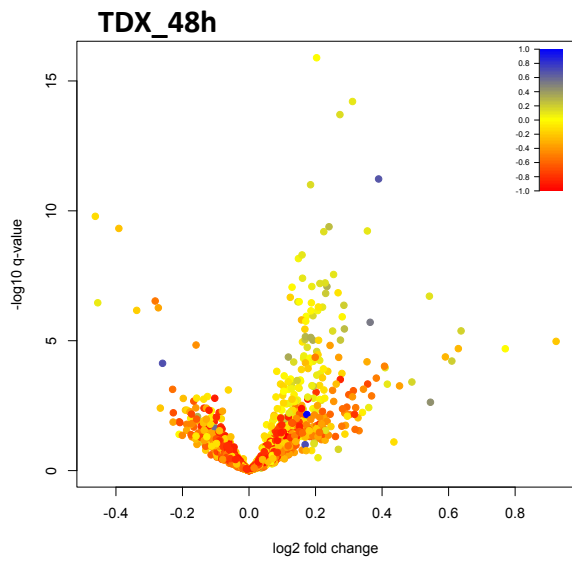



**Figure S9.** Proteins ranked after their abundances in data sets shown in *Figures 2 and 4*. The significantly regulated proteins are depicted in red color.

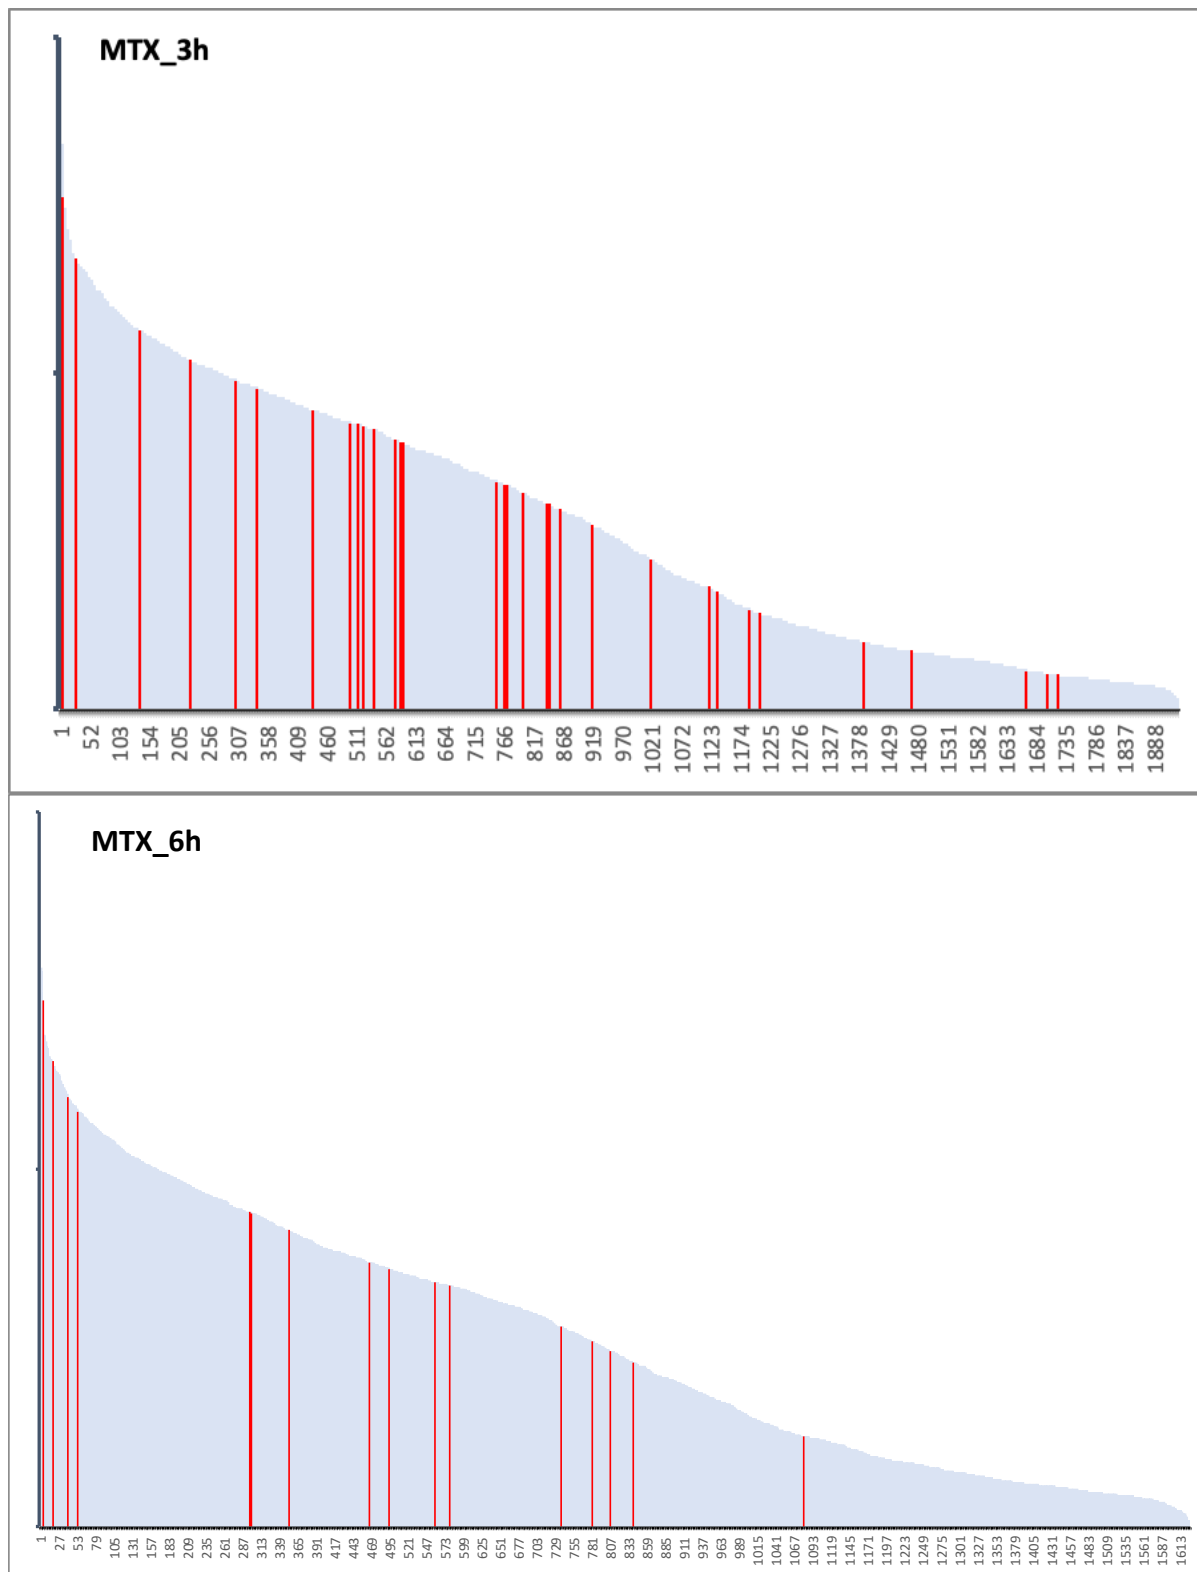

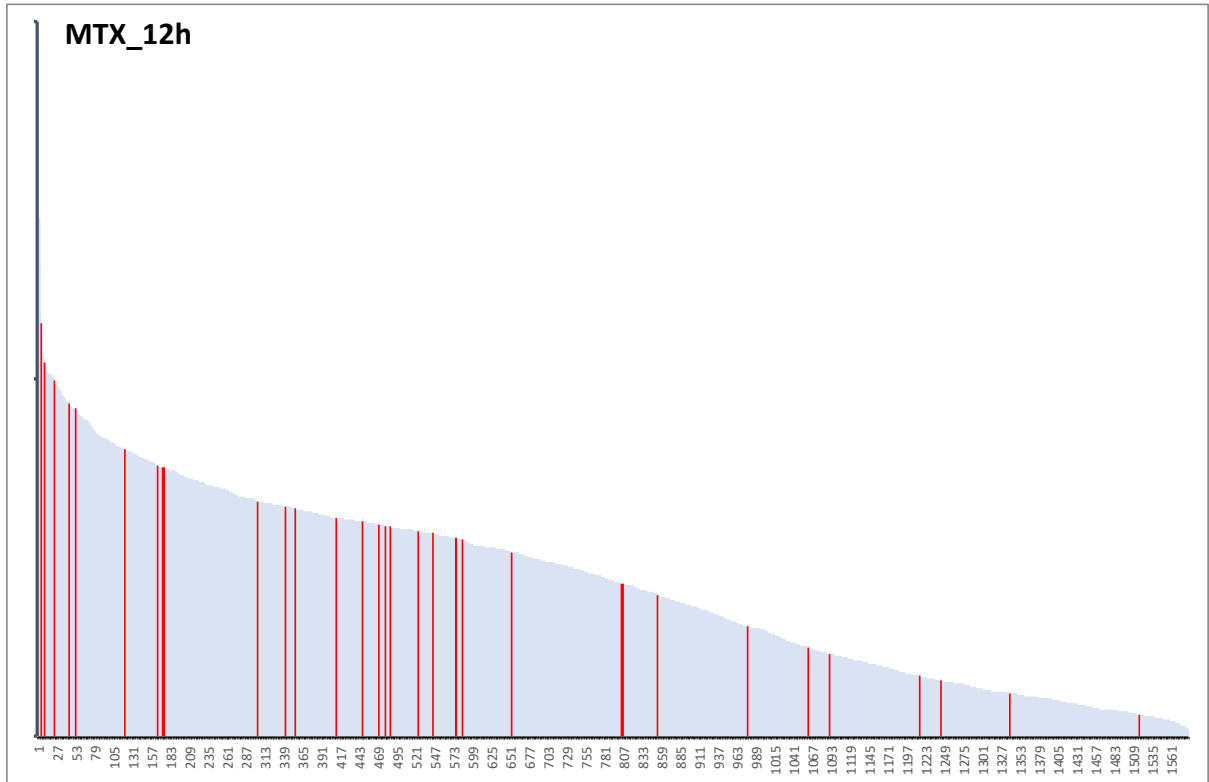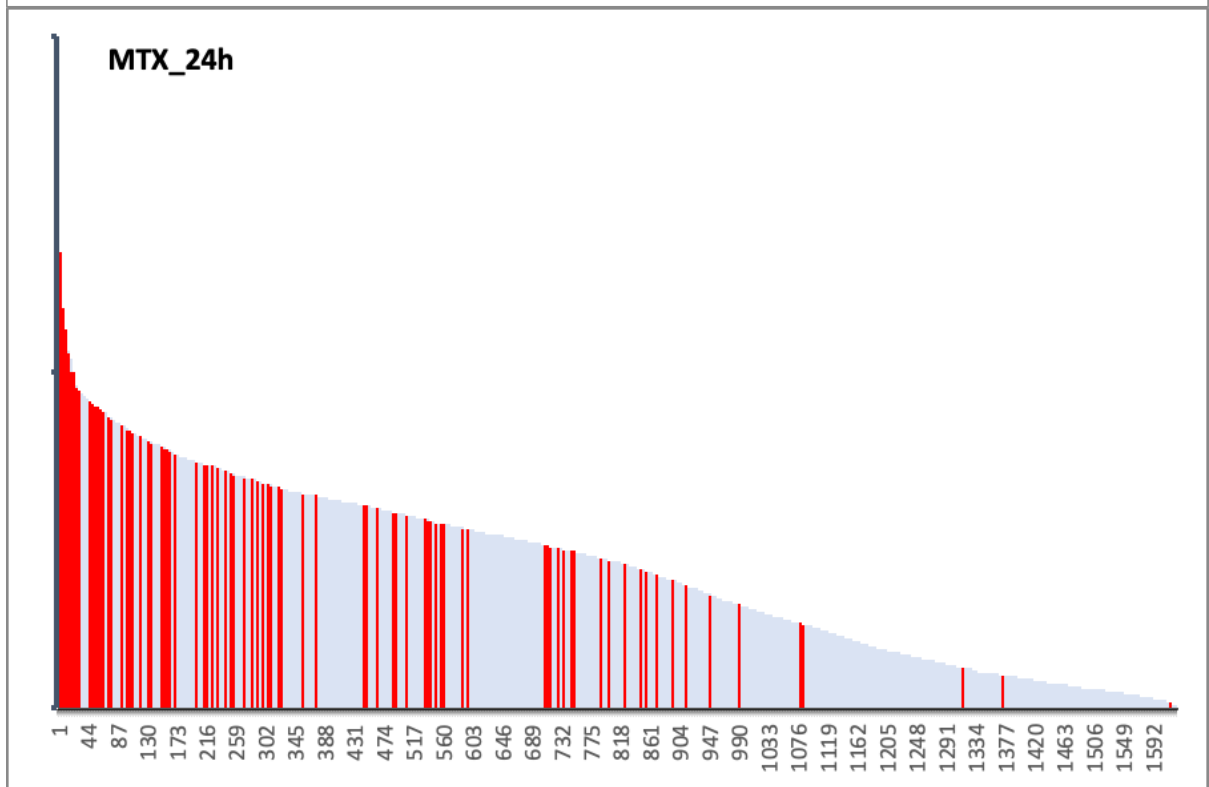

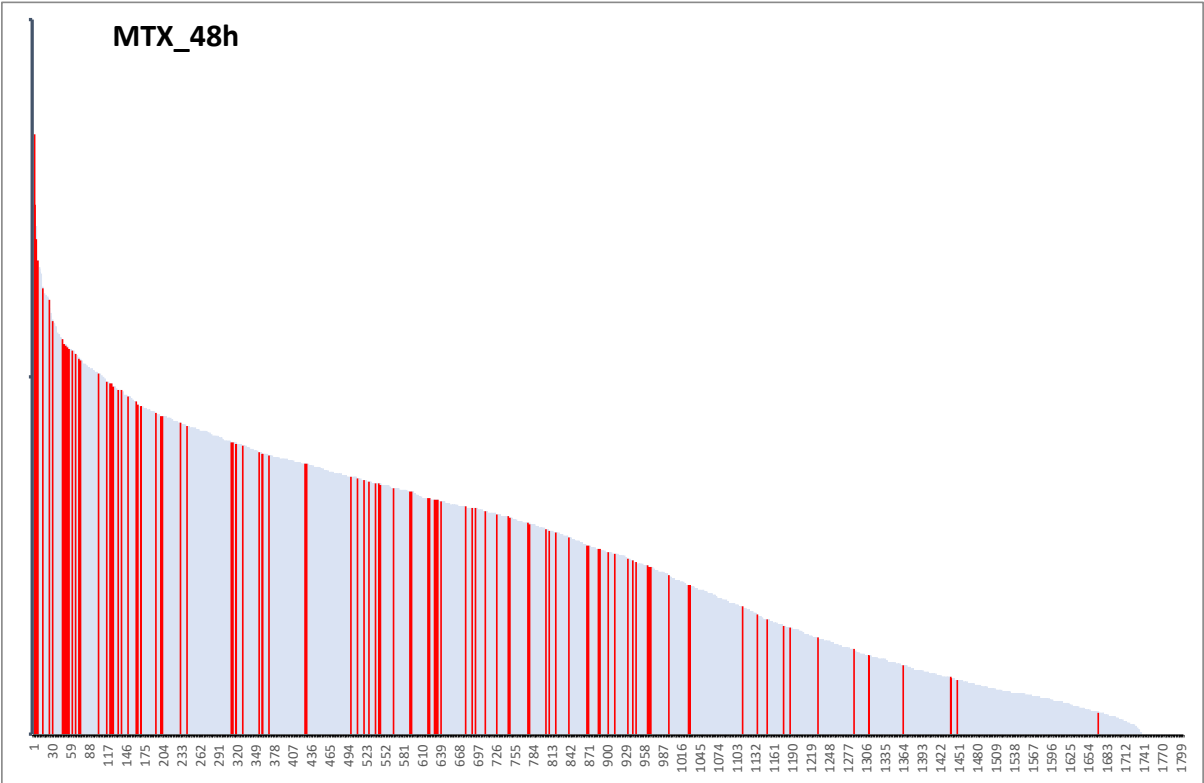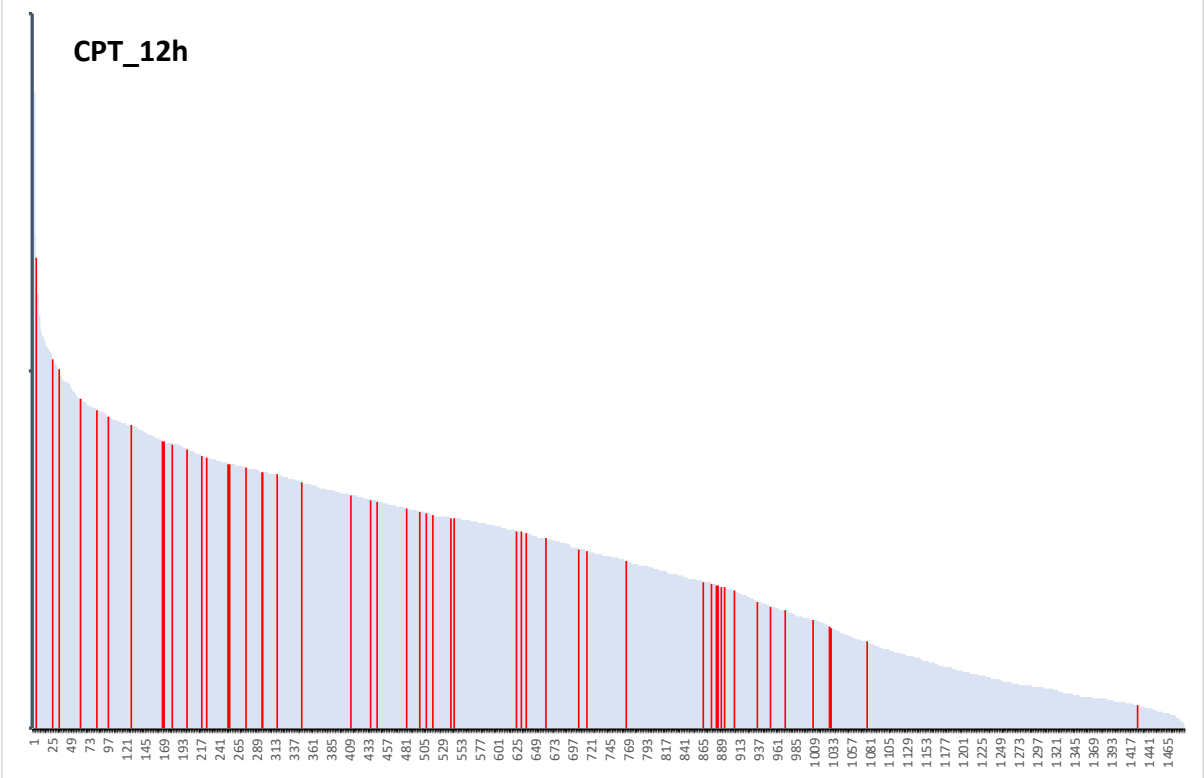

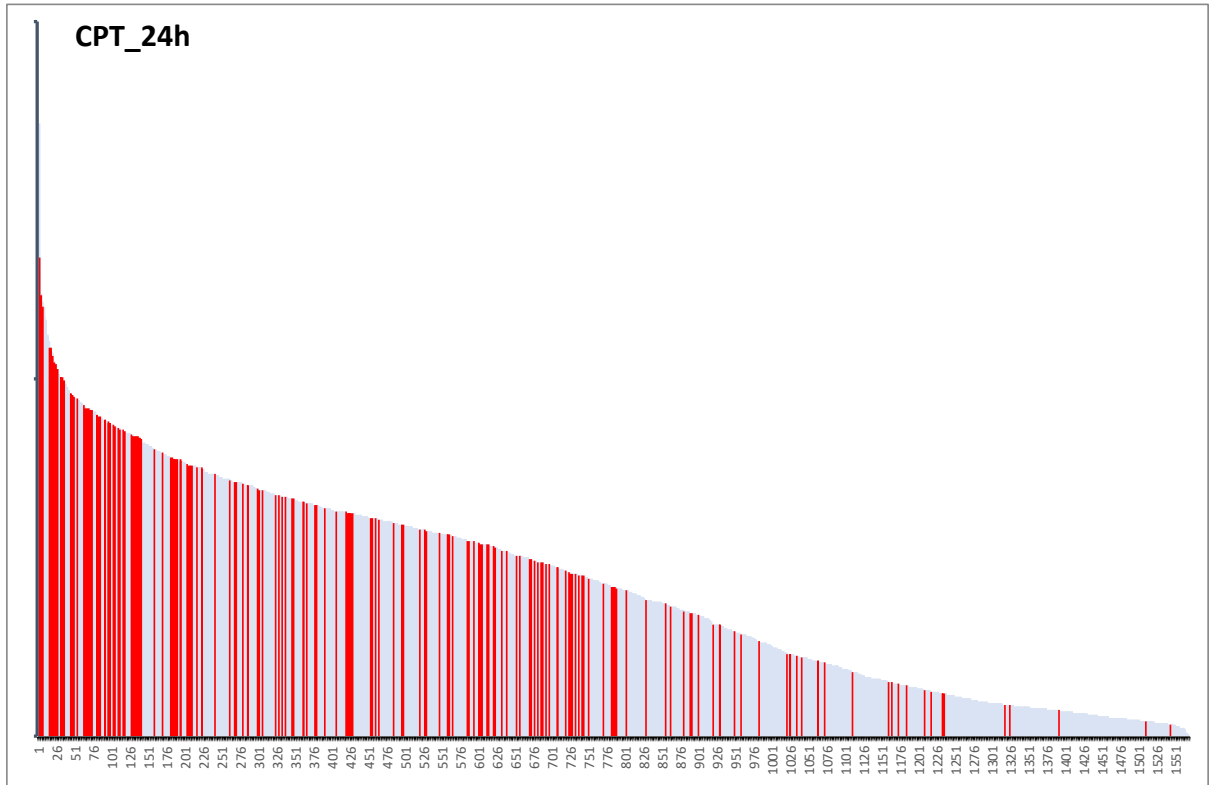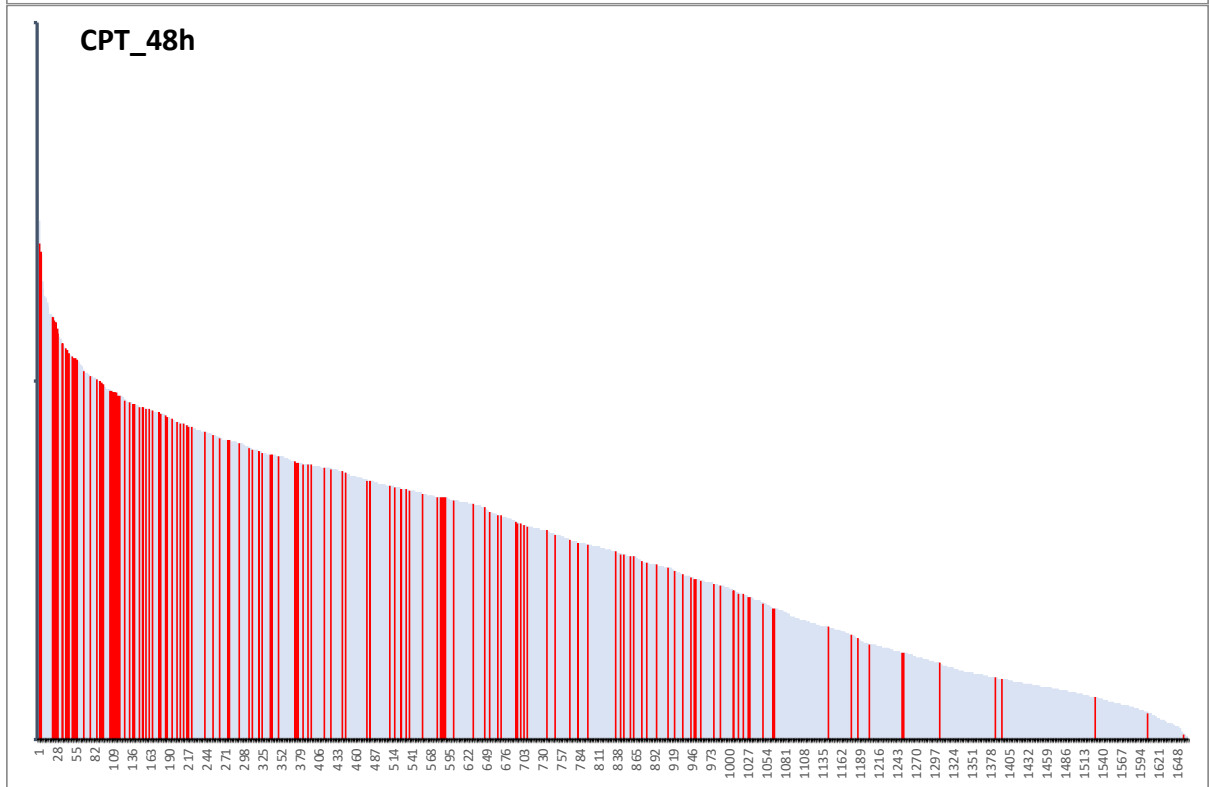

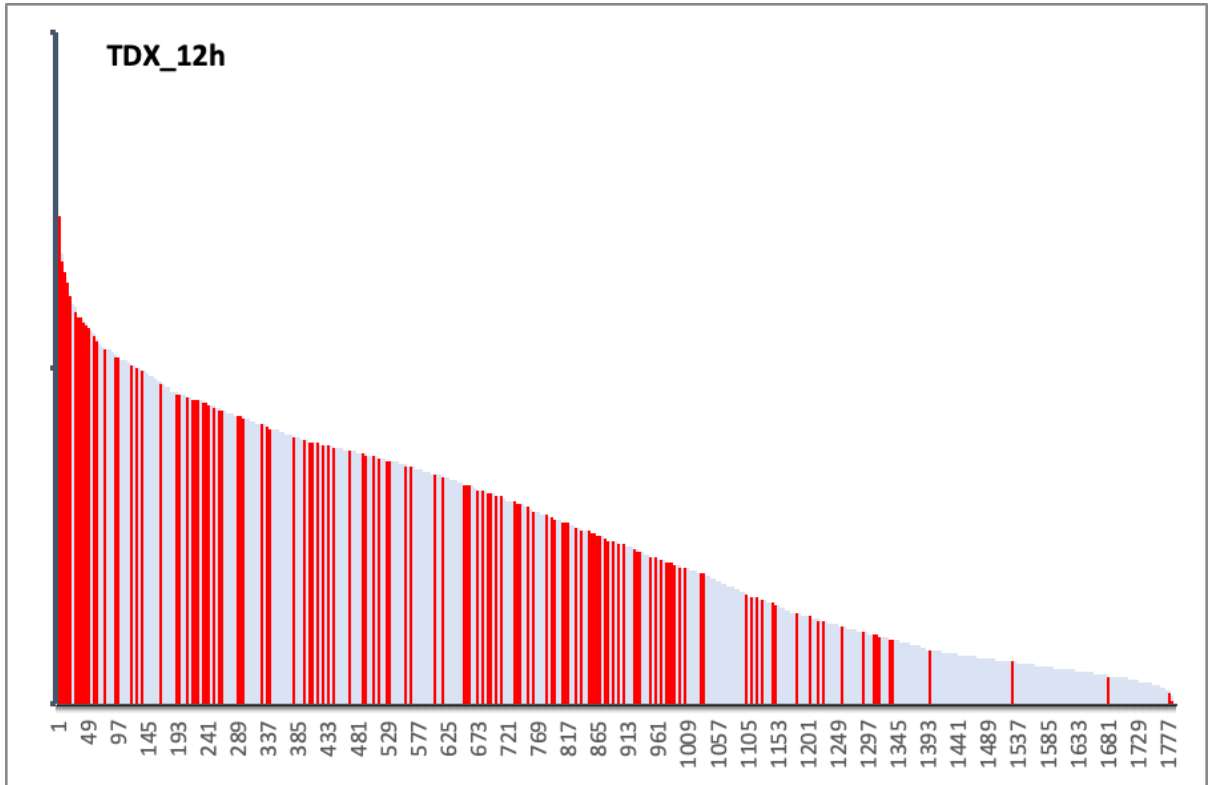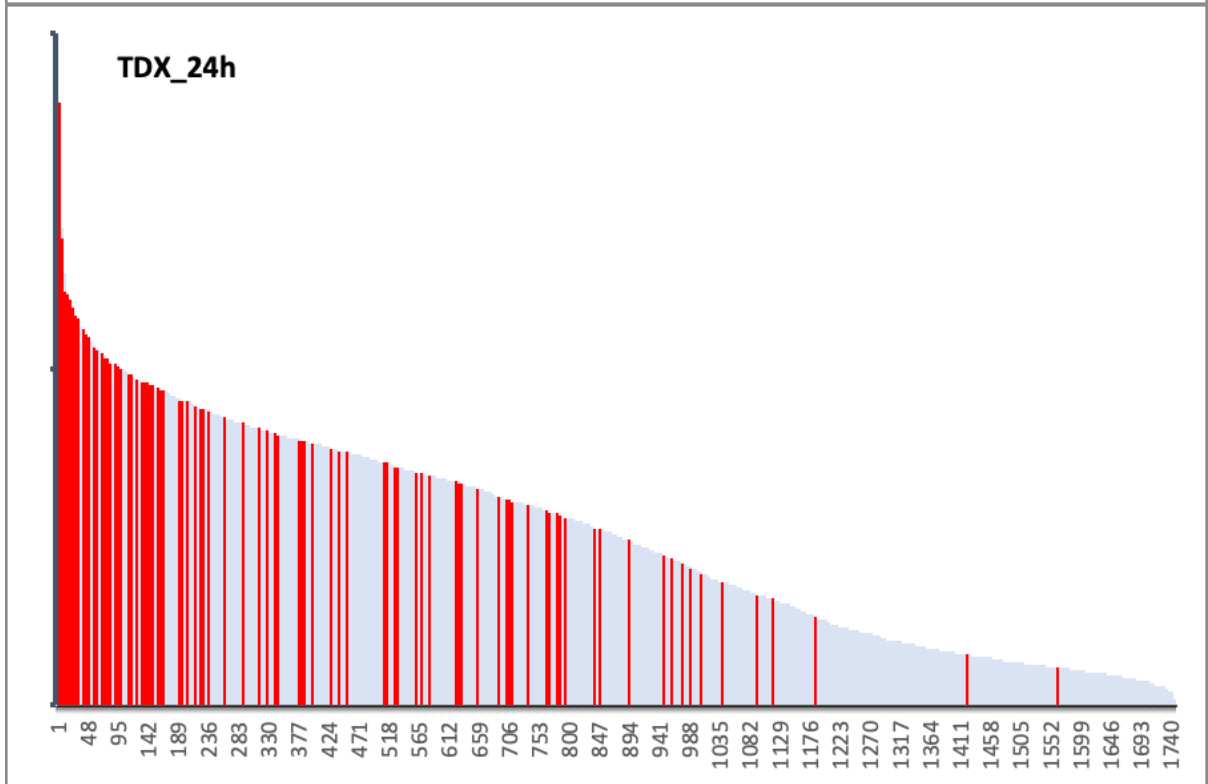

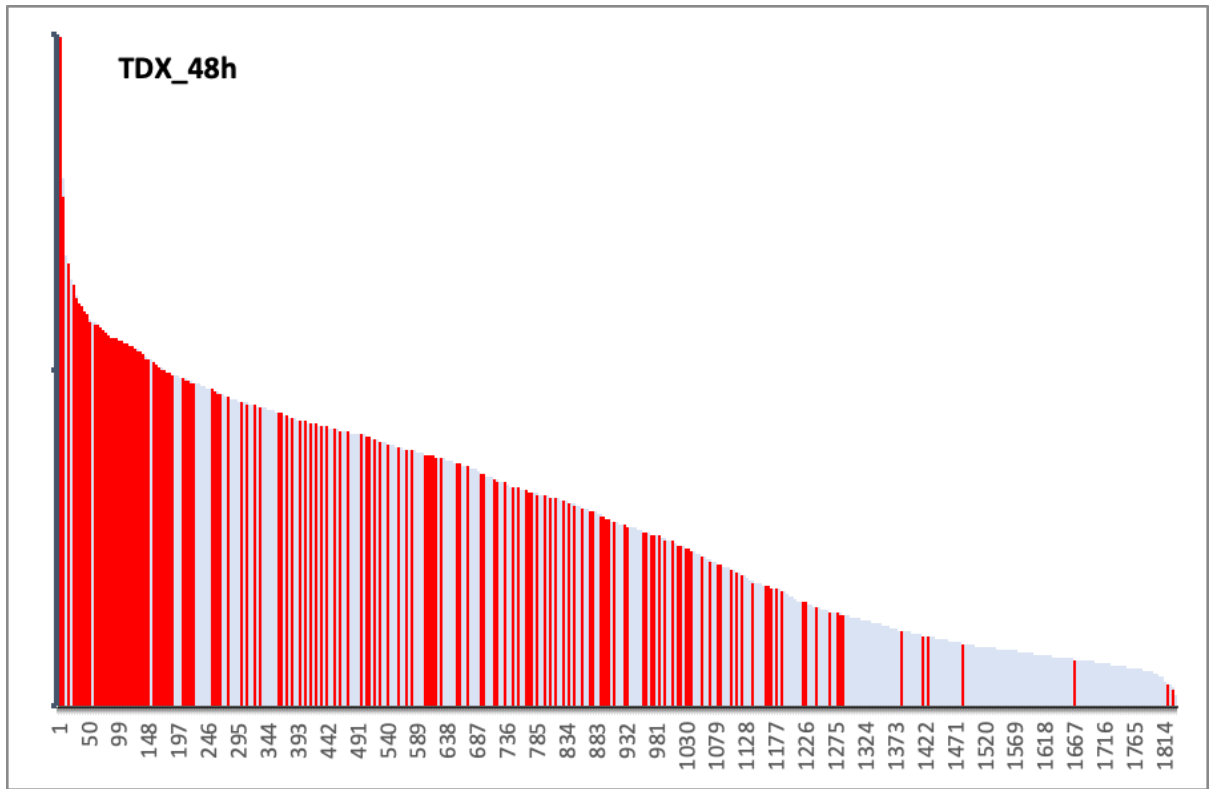

**Figure S10.** A) PCA plot of all single cell proteomics data acquired with MTX-treated and control cells. The cells were color-coded according to their treatment time and treatment status (see legend). B) The histogram of cells' first principal component (t[1]) for different treatment times.

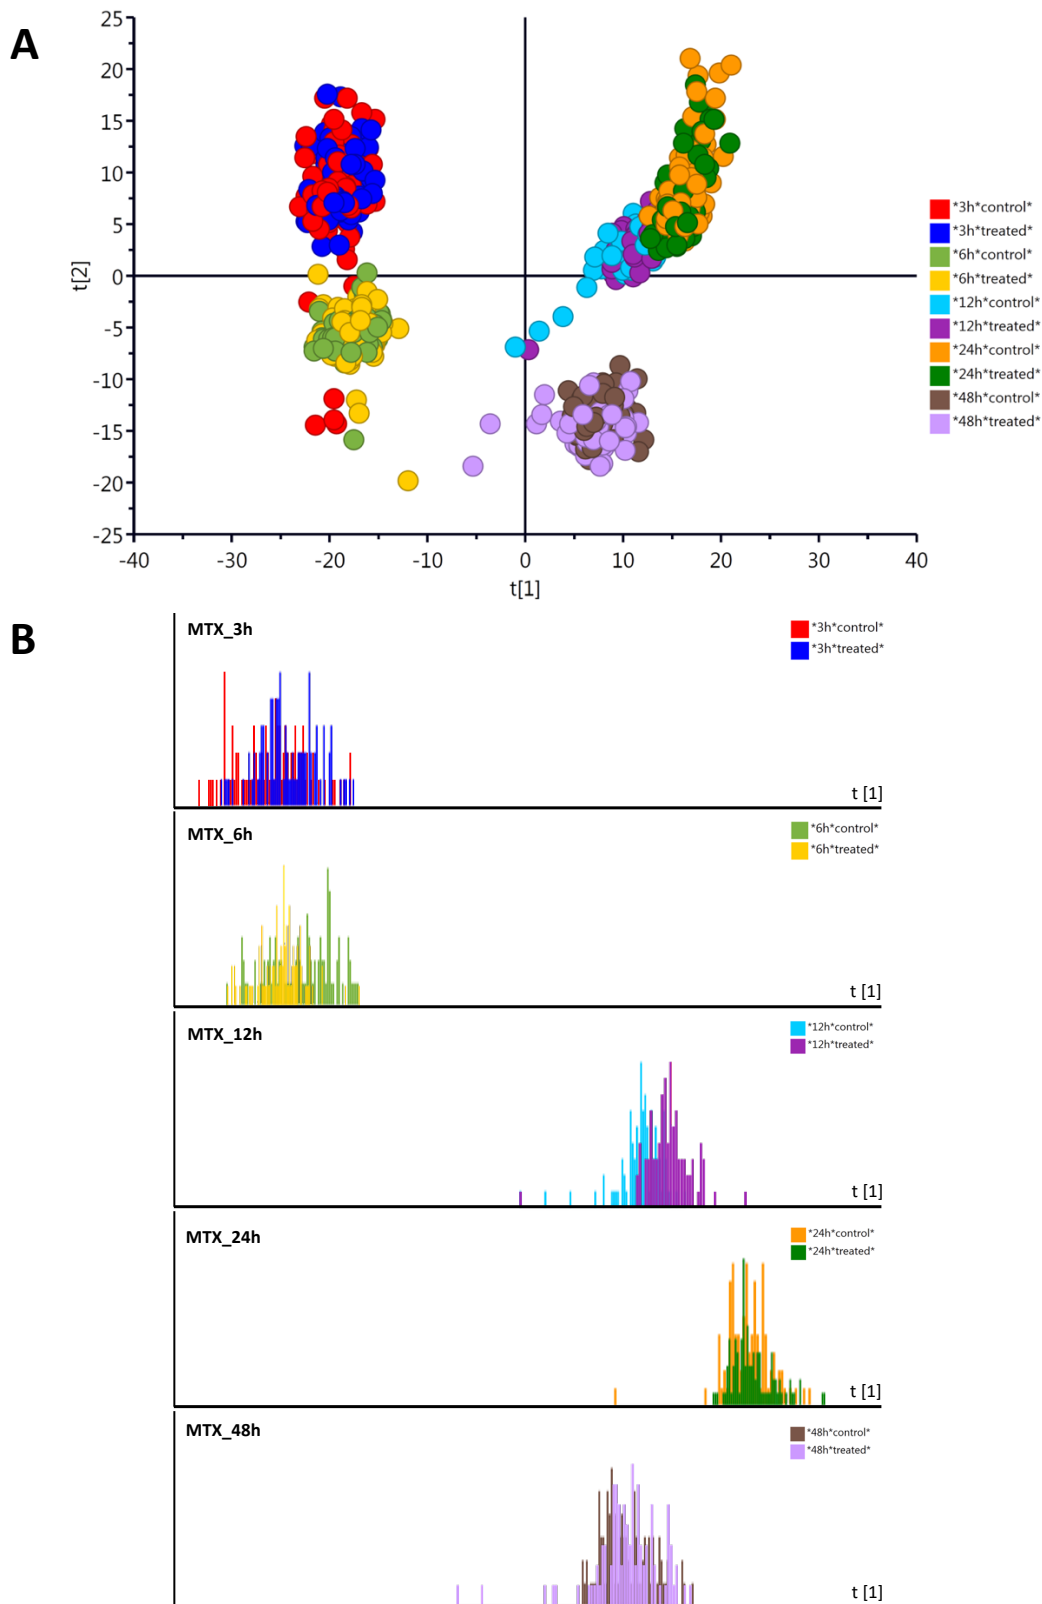

**Figure S11.** Pathway analysis of 179 proteins with significantly different abundances in G1 versus G2 subpopulations at 12 h past MTX treatment revealed that they preferentially belong to metabolic pathways and carbon metabolism (enriched in G2), as well as ribosome- and proteasome-related pathways (enriched in G1).

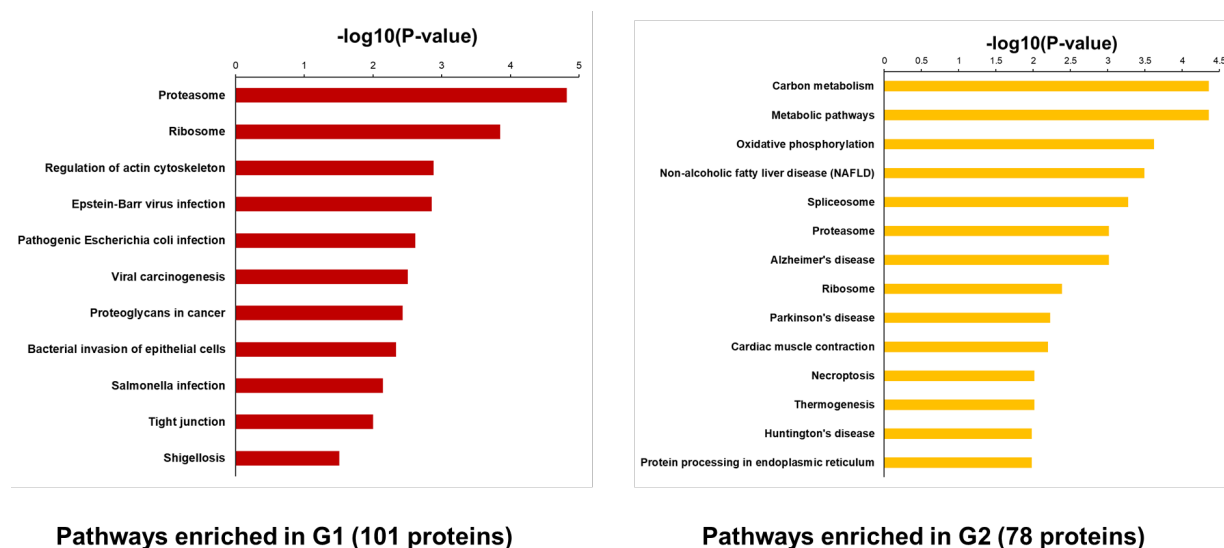

Supplement: ac2c00413_si_001.pdf [file ac2c00413_si_001.pdf]
